# Supplementary material
Source: PubMed Central journal article supplement (PMC2224576)
Supplement: jvirol_JVI.01706-07_1.pdf [file jvirol_JVI.01706-07_1.pdf]

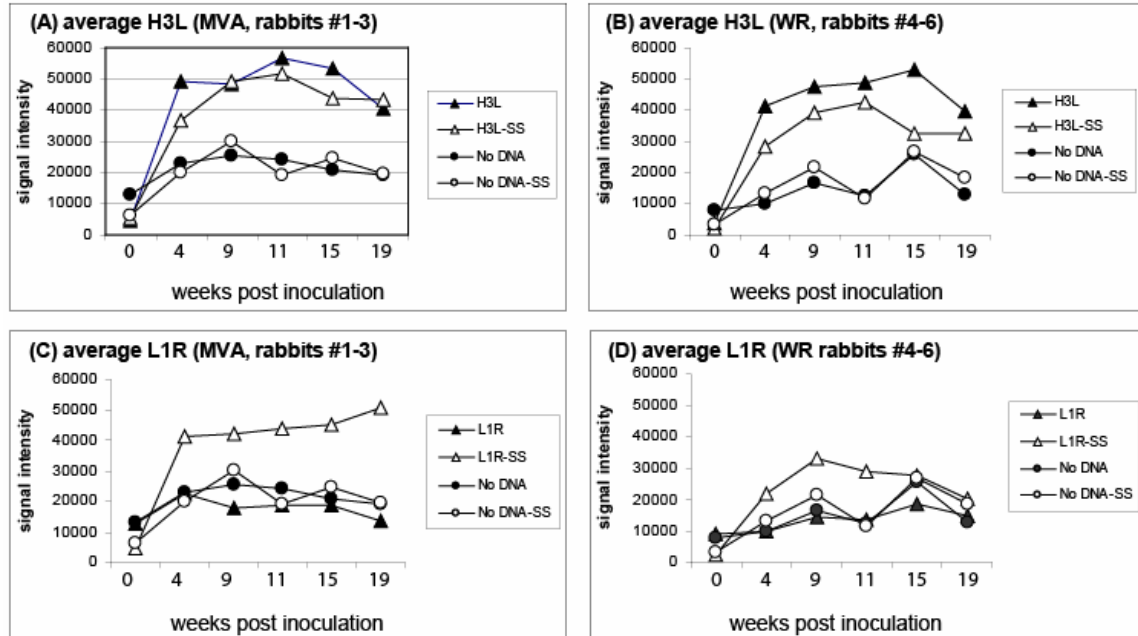

**Supplemental FIG. 1. Requirement for expression of MV envelope protein, L1, in conditions to promote disulfide bond formation, for recognition on microarray by vaccinia-immune sera.**

Two groups of rabbits were inoculated with MVA or WR to generate hyperimmune sera, and sera taken at 5 time points, as shown in Figure 1A. Sera were used to probe arrays containing L1 and H3 (the latter as a control) that were expressed in both RTS-100 and RTS-disulfide kits from Roche. Proteins expressed in disulfide kits are designated by ‘SS’. Control spots for each reaction consisted of reactions lacking template DNA. Data for H3 spots shown in panels (A) and (B), data for L1 shown in panels (C) and (D).

Shown are average signal intensities of three rabbits in each group.
